# Supplementary material
Source: Springer Nature journal article supplement (https://www.springermedizin.de/resource/supplementary/12885_2013_5235_MOESM9_ESM.pdf/9466248)

**A**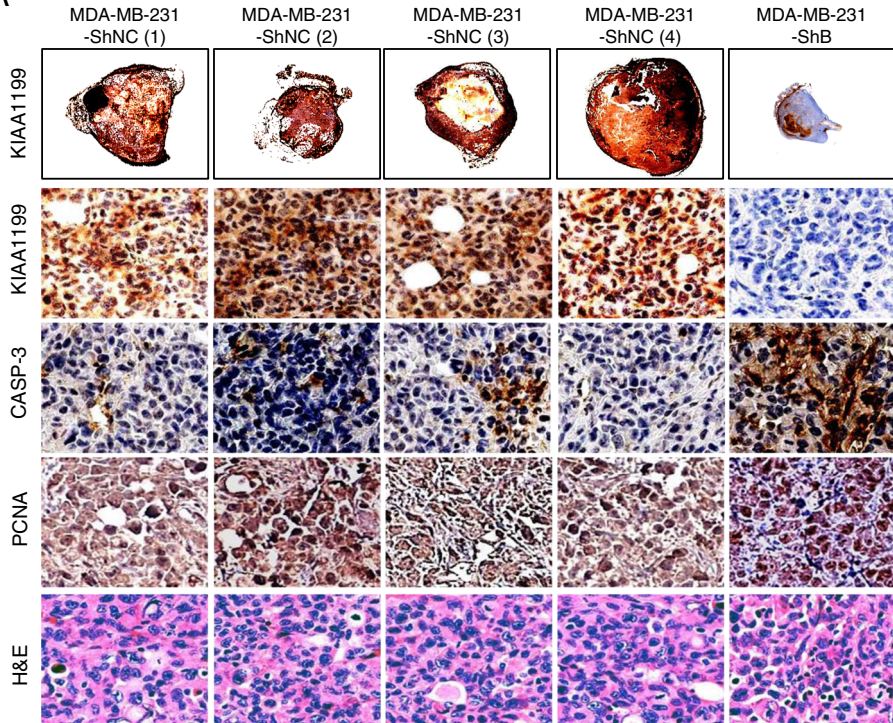**B**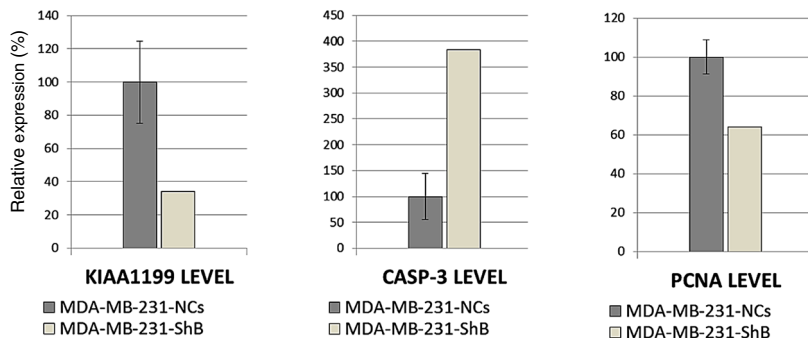

Supplement: MOESM9 [file 9466248]
